# Supplementary material for: Toward comprehension of the cytotoxicity of heterogeneous TiO2-based engineered nanoparticles: a nano-QSAR approach
Source: Royal Society of Chemistry journal article supplement (doi:10.1039/d0en01266a), 2021-01-01
Supplement: d0en01266a1.pdf [file d0en01266a1.pdf]

## Electronic Supplementary Information

**Table S1.** Results obtained from regression based nano-QSAR models. Experimental and predicted EC<sub>50</sub> values of 34 modified TiO<sub>2</sub> nanoparticles are reported.

| No. | Sample      | Amount of noble metal [mol %] |     |    | Size [nm] | MW [mol/L] | BET Surface Area [m <sup>2</sup> /g] | Observed log(EC <sub>50</sub> ) <sup>-1</sup> data [molar] | Model I                  |        |                                                     | Model II                 |        |                                                     |
|-----|-------------|-------------------------------|-----|----|-----------|------------|--------------------------------------|------------------------------------------------------------|--------------------------|--------|-----------------------------------------------------|--------------------------|--------|-----------------------------------------------------|
|     |             | Ag                            | Pt  | Au |           |            |                                      |                                                            | Improved SMILES          | DCW    | Predicted log(EC <sub>50</sub> ) <sup>-1</sup> data | Improved SMILES          | DCW    | Predicted log(EC <sub>50</sub> ) <sup>-1</sup> data |
| 1   | 0.5Ag       | 0.5                           | 0   | 0  | 10.01     | 53.93      | 158.00                               | 4.72                                                       | [Ag]B1[Pt]C0[Au]D0E3F0G5 | 50.427 | 4.746                                               | [Ag]B1[Pt]C0[Au]D0E2F0G8 | 83.625 | 4.690                                               |
| 2   | 1.5Ag       | 1.5                           | 0   | 0  | 9.80      | 161.80     | 162.00                               | 4.89                                                       | [Ag]B2[Pt]C0[Au]D0E3F2G5 | 51.219 | 4.856                                               | [Ag]B2[Pt]C0[Au]D0E2F2G8 | 85.846 | 4.919                                               |
| 3   | 2.5Ag       | 2.5                           | 0   | 0  | 7.53      | 269.67     | 163.00                               | 5.35                                                       | [Ag]B3[Pt]C0[Au]D0E2F3G5 | 54.694 | 5.339                                               | [Ag]B3[Pt]C0[Au]D0E2F3G8 | 88.125 | 5.154                                               |
| 4   | 4.5Ag       | 4.5                           | 0   | 0  | 5.52      | 485.41     | 183.00                               | 5.70                                                       | [Ag]B4[Pt]C0[Au]D0E1F6G7 | 57.059 | 5.667                                               | [Ag]B4[Pt]C0[Au]D0E1F6G9 | 92.641 | 5.620                                               |
| 5   | 6.5Ag       | 6.5                           | 0   | 0  | 5.64      | 701.14     | 148.00                               | 5.88                                                       | [Ag]B5[Pt]C0[Au]D0E1F8G4 | 58.077 | 5.809                                               | [Ag]B5[Pt]C0[Au]D0E1F8G8 | 94.778 | 5.841                                               |
| 6   | 0.5Ag_0.1Pt | 0.5                           | 0.1 | 0  | 11.27     | 73.44      | 161.00                               | 4.64                                                       | [Ag]B1[Pt]C2[Au]D0E4F0G5 | 49.738 | 4.650                                               | [Ag]B1[Pt]C2[Au]D0E2F1G8 | 83.565 | 4.684                                               |
| 7   | 1.5Ag_0.1Pt | 1.5                           | 0.1 | 0  | 36.80     | 181.31     | 141.00                               | 4.84                                                       | [Ag]B2[Pt]C2[Au]D0E8F2G3 | 51.332 | 4.871                                               | [Ag]B2[Pt]C2[Au]D0E8F2G8 | 85.486 | 4.882                                               |
| 8   | 2.5Ag_0.1Pt | 2.5                           | 0.1 | 0  | 5.63      | 289.18     | 152.00                               | 5.06                                                       | [Ag]B3[Pt]C2[Au]D0E1F4G4 | 53.348 | 5.152                                               | [Ag]B3[Pt]C2[Au]D0E1F3G8 | 88.303 | 5.173                                               |
| 9   | 4.5Ag_0.1Pt | 4.5                           | 0.1 | 0  | 21.97     | 504.91     | 115.00                               | 5.54                                                       | [Ag]B4[Pt]C2[Au]         | 56.266 | 5.557                                               | [Ag]B4[Pt]C2[Au]         | 92.514 | 5.607                                               |

|    |              |     |      |   |       |        |        |      |                               |        |       |                               |        |       |
|----|--------------|-----|------|---|-------|--------|--------|------|-------------------------------|--------|-------|-------------------------------|--------|-------|
| 10 | 6.5Ag_0.1Pt  | 6.5 | 0.1  | 0 | 5.70  | 720.65 | 130.00 | 5.63 | [Ag]B5[Pt]C2[Au]<br>]D0E1F8G2 | 57.230 | 5.691 | [Ag]B5[Pt]C2[Au]<br>]D0E1F9G7 | 92.775 | 5.634 |
| 11 | 0.5Ag_0.25Pt | 0.5 | 0.25 | 0 | 6.40  | 102.71 | 138.00 | 4.73 | [Ag]B1[Pt]C3[Au]<br>]D0E1F1G2 | 50.058 | 4.694 | [Ag]B1[Pt]C3[Au]<br>]D0E1F1G8 | 85.778 | 4.912 |
| 12 | 1.5Ag_0.25Pt | 1.5 | 0.25 | 0 | 45.60 | 210.57 | 172.00 | 5.01 | [Ag]B2[Pt]C3[Au]<br>]D0E9F2G6 | 53.127 | 5.121 | [Ag]B2[Pt]C3[Au]<br>]D0E9F2G9 | 85.409 | 4.874 |
| 13 | 2.5Ag_0.25Pt | 2.5 | 0.25 | 0 | 3.23  | 318.44 | 144.00 | 5.37 | [Ag]B3[Pt]C3[Au]<br>]D0E0F4G3 | 54.586 | 5.324 | [Ag]B3[Pt]C3[Au]<br>]D0E1F4G8 | 90.233 | 5.372 |
| 14 | 4.5Ag_0.25Pt | 4.5 | 0.25 | 0 | 12.87 | 534.18 | 151.00 | 5.65 | [Ag]B4[Pt]C3[Au]<br>]D0E5F6G4 | 58.070 | 5.808 | [Ag]B4[Pt]C3[Au]<br>]D0E3F6G8 | 91.064 | 5.458 |
| 15 | 6.5Ag_0.25Pt | 6.5 | 0.25 | 0 | 12.70 | 749.91 | 135.00 | 5.84 | [Ag]B5[Pt]C3[Au]<br>]D0E5F8G2 | 57.889 | 5.783 | [Ag]B5[Pt]C3[Au]<br>]D0E3F9G7 | 92.546 | 5.610 |
| 16 | 0.5Ag_0.5Pt  | 0.5 | 0.5  | 0 | 5.42  | 151.48 | 165.00 | 4.94 | [Ag]B1[Pt]C4[Au]<br>]D0E1F2G5 | 51.391 | 4.880 | [Ag]B1[Pt]C4[Au]<br>]D0E1F2G8 | 85.281 | 4.861 |
| 17 | 1.5Ag_0.5Pt  | 1.5 | 0.5  | 0 | 5.12  | 259.34 | 164.00 | 5.26 | [Ag]B2[Pt]C4[Au]<br>]D0E1F3G5 | 54.075 | 5.253 | [Ag]B2[Pt]C4[Au]<br>]D0E1F3G8 | 88.153 | 5.157 |
| 18 | 2.5Ag_0.5Pt  | 2.5 | 0.5  | 0 | 13.87 | 367.21 | 181.00 | 5.32 | [Ag]B3[Pt]C4[Au]<br>]D0E5F5G7 | 54.512 | 5.313 | [Ag]B3[Pt]C4[Au]<br>]D0E3F4G9 | 90.376 | 5.387 |
| 19 | 4.5Ag_0.5Pt  | 4.5 | 0.5  | 0 | 7.70  | 582.95 | 166.00 | 5.65 | [Ag]B4[Pt]C4[Au]<br>]D0E2F7G5 | 56.993 | 5.658 | [Ag]B4[Pt]C4[Au]<br>]D0E2F7G8 | 93.707 | 5.730 |
| 20 | 6.5Ag_0.5Pt  | 6.5 | 0.5  | 0 | 15.00 | 798.68 | 134.00 | 5.80 | [Ag]B5[Pt]C4[Au]<br>]D0E6F9G2 | 58.155 | 5.819 | [Ag]B5[Pt]C4[Au]<br>]D0E3F9G7 | 93.606 | 5.720 |
| 21 | 0.1Pt        | 0   | 0.1  | 0 | 6.38  | 19.51  | 134.60 | 4.53 | [Ag]B0[Pt]C2[Au]<br>]D0E1F0G2 | 48.534 | 4.483 | [Ag]B0[Pt]C2[Au]<br>]D0E1F0G7 | 82.276 | 4.551 |
| 22 | 0.25Pt       | 0   | 0.25 | 0 | 6.39  | 48.77  | 163.38 | 4.67 | [Ag]B0[Pt]C3[Au]              | 50.793 | 4.797 | [Ag]B0[Pt]C3[Au]              | 82.074 | 4.530 |

|    |               |   |      |      |      |        |        |      |                                            |        |       |                                             |        |       |
|----|---------------|---|------|------|------|--------|--------|------|--------------------------------------------|--------|-------|---------------------------------------------|--------|-------|
| 23 | 0.5Pt         | 0 | 0.5  | 0    | 6.62 | 97.54  | 129.20 | 4.73 | ]D0E1F0G5<br>[Ag]B0[Pt]C4[Au]<br>]D0E1F1G2 | 48.341 | 4.456 | u]D0E1F0G8<br>[Ag]B0[Pt]C4[Au]<br>]D0E2F1G7 | 83.272 | 4.653 |
| 24 | 1.25Pt        | 0 | 1.25 | 0    | 5.65 | 243.86 | 152.10 | 4.71 | [Ag]B0[Pt]C5[Au]<br>]D0E1F3G4              | 50.229 | 4.718 | [Ag]B0[Pt]C5[Au]<br>]D0E1F3G8               | 84.956 | 4.827 |
| 25 | 0.1Au         | 0 | 0    | 0.1  | 6.47 | 19.70  | 187.80 | 4.56 | [Ag]B0[Pt]C0[Au]<br>]D2E1F0G8              | 49.491 | 4.616 | [Ag]B0[Pt]C0[Au]<br>]D2E1F0G9               | 84.941 | 4.826 |
| 26 | 0.25Au        | 0 | 0    | 0.25 | 6.21 | 49.24  | 168.10 | 4.62 | [Ag]B0[Pt]C0[Au]<br>]D3E1F0G6              | 49.787 | 4.657 | [Ag]B0[Pt]C0[Au]<br>]D3E1F0G9               | 83.342 | 4.661 |
| 27 | 0.5Au_0.1Pt   | 0 | 0.1  | 0.5  | 6.02 | 117.99 | 196.40 | 4.75 | [Ag]B0[Pt]C2[Au]<br>]D4E1F1G9              | 50.305 | 4.729 | [Ag]B0[Pt]C2[Au]<br>]D4E1F1G9               | 83.496 | 4.676 |
| 28 | 0.1Au_0.1Pt   | 0 | 0.1  | 0.1  | 5.97 | 39.21  | 190.59 | 4.68 | [Ag]B0[Pt]C2[Au]<br>]D2E1F0G8              | 49.837 | 4.664 | [Ag]B0[Pt]C2[Au]<br>]D2E1F0G9               | 83.077 | 4.633 |
| 29 | 0.25Au_0.25Pt | 0 | 0.25 | 0.25 | 6.22 | 98.01  | 154.10 | 4.66 | [Ag]B0[Pt]C3[Au]<br>]D3E1F1G4              | 49.834 | 4.663 | [Ag]B0[Pt]C3[Au]<br>]D3E1F1G8               | 83.970 | 4.725 |
| 30 | 0.5Au_0.5Pt   | 0 | 0.5  | 0.5  | 6.34 | 196.03 | 151.07 | 4.68 | [Ag]B0[Pt]C4[Au]<br>]D4E1F2G4              | 50.032 | 4.691 | [Ag]B0[Pt]C4[Au]<br>]D4E1F2G8               | 83.687 | 4.696 |
| 31 | 0.5Au_0.25Pt  | 0 | 0.25 | 0.5  | 5.11 | 147.25 | 153.48 | 4.70 | [Ag]B0[Pt]C3[Au]<br>]D4E1F2G4              | 50.325 | 4.732 | [Ag]B0[Pt]C3[Au]<br>]D4E1F2G8               | 82.627 | 4.587 |
| 32 | 0.1Au_0.25Pt  | 0 | 0.25 | 0.1  | 4.97 | 68.47  | 105.00 | 4.70 | [Ag]B0[Pt]C3[Au]<br>]D2E1F0G0              | 49.823 | 4.662 | [Ag]B0[Pt]C3[Au]<br>]D2E1F1G6               | 82.722 | 4.597 |
| 33 | 0.25Au_0.1Pt  | 0 | 0.1  | 0.25 | 4.54 | 68.75  | 150.45 | 4.76 | [Ag]B0[Pt]C2[Au]<br>]D3E1F0G4              | 49.735 | 4.650 | [Ag]B0[Pt]C2[Au]<br>]D3E1F1G8               | 83.797 | 4.707 |
| 34 | 0.05Au_0.05Pt | 0 | 0.05 | 0.05 | 6.48 | 19.60  | 164.97 | 4.67 | [Ag]B0[Pt]C1[Au]<br>]D1E1F0G5              | 49.903 | 4.673 | [Ag]B0[Pt]C1[Au]<br>]D1E1F0G8               | 82.491 | 4.573 |
